# Supplementary material
Source: PubMed Central journal article supplement (PMC518807)
Supplement: pnas_101_37_13648__3.pdf [file pnas_101_37_13648__3.pdf]

Table 1. Differences in general health status of *NPAS3* null animals compared with wildtype (wt) littermates

| <b>Test</b>                           | <b>Results</b>                                                                                               |
|---------------------------------------|--------------------------------------------------------------------------------------------------------------|
| Body weight                           | 20% < wt animals (both sexes)                                                                                |
| Body temperature                      | Normal                                                                                                       |
| Postural reflex to cage shake         | Impaired                                                                                                     |
| Tail suspension                       | Limp, no struggle                                                                                            |
| Eye-blink response                    | Normal                                                                                                       |
| Ear-twitch response                   | Normal                                                                                                       |
| Whisker orientation                   | Normal                                                                                                       |
| Intruder response (q-tip approaching) | Impaired, either attack or ignore                                                                            |
| Smell                                 | Normal                                                                                                       |
| Hearing                               | Normal                                                                                                       |
| Wire-hanging test                     | Normal                                                                                                       |
| Ataxia                                | Slightly smaller and irregular step size                                                                     |
| Rotating rod test                     | Require more restarts, but improve latency times with practice in a manner indistinguishable from wt animals |

These results are for *NPAS3* null animals compared with wt littermates. No deficits were observed in any test in *NPAS1* null animals relative to wt animals, and no obvious exacerbations were observed for double-null animals as compared with *NPAS3* homozygotes.
